# Supplementary material for: A web of poly(bisbenzimidazolatocopper(ii)) around multiwalled carbon nanotubes for the electrochemical detection of hydrogen peroxide
Source: Royal Society of Chemistry journal article supplement (doi:10.1039/d1nj04903h), 2021-11-30
Supplement: d1nj04903h1.pdf [file d1nj04903h1.pdf]

### Supporting information

**Table S1.** Various modes of vibrations extracted from the FT-IR spectra of MWCNT, BIM-H, (BIM-Cu<sup>2+</sup>)<sub>n</sub> and MWCNT/(BIM-Cu<sup>2+</sup>)<sub>n</sub>

| MWCNT | BIM-H     | (BIM-Cu <sup>2+</sup> ) <sub>n</sub> | MWCNT/(BIM-Cu <sup>2+</sup> ) <sub>n</sub> | Peak assignment                      |
|-------|-----------|--------------------------------------|--------------------------------------------|--------------------------------------|
| 3126  | 3117      | 3128                                 | 3133                                       | C-H stretching                       |
| 1642  |           |                                      | 1637                                       | -C=C- stretching                     |
| 1392  |           |                                      | 1399                                       | -C-H bending                         |
|       | 3350-2400 |                                      |                                            | N-H stretching                       |
|       | 1774      |                                      |                                            | N-H bending                          |
|       | 1609      | 1609                                 |                                            | Imidazole (IM) in-plane N-H bending  |
|       | 1466      | 1468                                 |                                            | Ring stretching                      |
|       | 1407      | 1399                                 |                                            | Ring stretching                      |
|       | 1238      | 1238                                 |                                            | C-N stretching                       |
|       | 1248      |                                      |                                            | N-H in plane bending                 |
|       | 1129      | 1211                                 | 1129                                       | BIM in-plane C-H bending             |
|       | 998       |                                      |                                            | BIM in-plane ring bending            |
|       | 954       |                                      |                                            | IM C-H in-plane bending              |
|       | 886       |                                      |                                            | IM in-plane ring bending             |
|       | 742       | 747                                  |                                            | BIM C-H out-of-plane bending         |
|       |           | 300.6                                | 295.6                                      | Cu <sup>2+</sup> -N stretching and g |
|       |           | 323.1                                | 306.8                                      | N-Cu <sup>2+</sup> -N bending        |

## Supporting information

## Supporting information

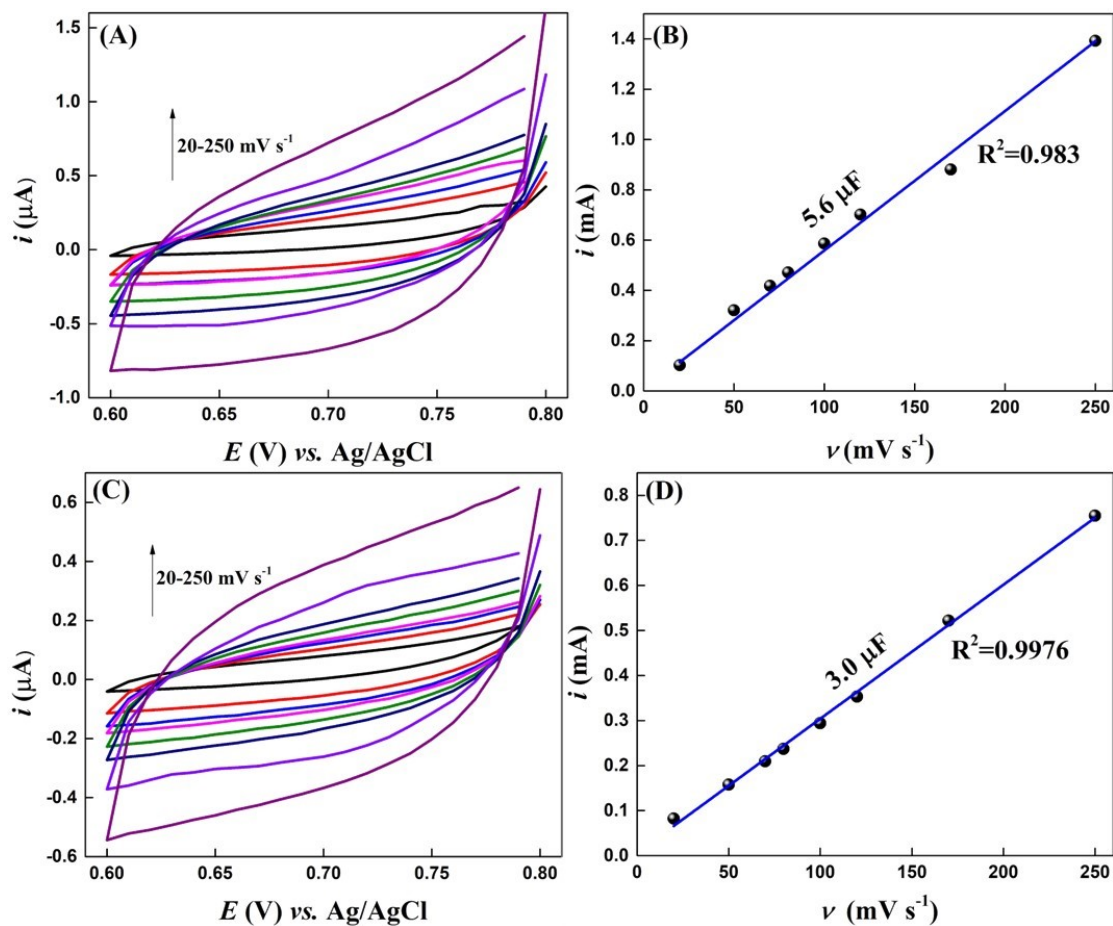

**Fig. S1** (A and C) MWCNT/(BIM-Cu<sup>2+</sup>)<sub>n</sub> and MWCNT cyclic voltammetry analysis at various scan rates (20-250 mV s<sup>-1</sup>) (B and D) capacitive current densities as a function of scan rate

## Supporting information

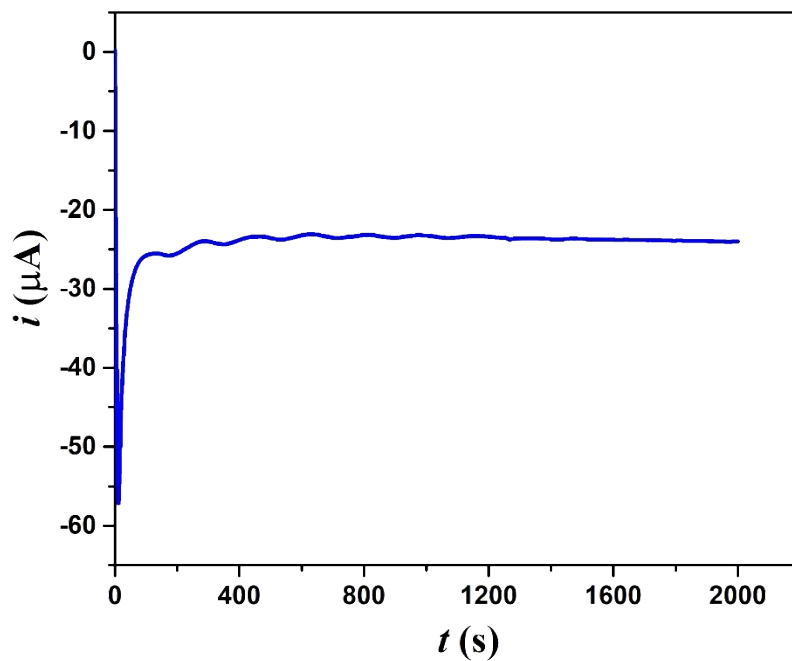

**Fig. S2** Chronoamperometry of MWCNT/(BIM-Cu<sup>2+</sup>)<sub>n</sub>@GCE in 5 mM H<sub>2</sub>O<sub>2</sub> containing PBS at -0.2 V for 2000 s
